# Supplementary material
Source: Springer Nature journal article supplement (https://eprints.lancs.ac.uk/236991/1/41612_2026_1398_MOESM1_ESM.pdf)
Supplement: MOESM1 [file 41612_2026_1398_MOESM1_ESM.pdf]

Confirming the substantial contribution of  
ozone-depleting halocarbon emissions to global  
warming during the second half of the 20th century

M. Friedel<sup>1\*†</sup>, G. Chiodo<sup>2,3\*†</sup>, K. Weber<sup>3\*†</sup>, L.M. Polvani<sup>4,5</sup>, J. S.  
Daniel<sup>6</sup>, N. L. Abraham<sup>9,13</sup>, S.M. Davis<sup>6</sup>, M. Deushi<sup>8</sup>, N.  
Oshima<sup>8</sup>, L. W. Horowitz<sup>10</sup>, J. F. Lamarque<sup>11</sup>, J. Keeble<sup>7</sup>, L.  
Nazarenko<sup>12</sup>, C. Orbe<sup>12</sup>

<sup>1</sup>Institute for Meteorology, University of Leipzig, Germany.

<sup>2</sup>Instituto de Geociencias, Spanish National Research Council  
(IGEO-CSIC), Madrid, Spain.

<sup>3</sup>Institute for Atmospheric and Climate Science, ETH Zurich,  
Switzerland.

<sup>4</sup>Dep. of Applied Physics and Applied Math, Columbia University, New  
York (NY), USA.

<sup>5</sup>Lamont Doherty Observatory, Palisades (NY), USA.

<sup>6</sup>Chemical Sciences Laboratory, NOAA, Boulder (CO), USA.

<sup>7</sup>University of Lancaster, UK.

<sup>8</sup>Meteorological Research Institute, Tsukuba, Japan.

<sup>9</sup>Yusuf Hamied Department of Chemistry, University of Cambridge, UK.

<sup>10</sup>NOAA Geophysical Fluid Dynamics Laboratory, Princeton, USA.

<sup>11</sup>National Center for Atmospheric Research. Now at Three Cairns  
Group, New York, USA..

<sup>12</sup>NASA-GISS, New York (NY), USA.

<sup>13</sup>National Centre for Atmospheric Science, UK.

\*Corresponding author(s). E-mail(s): [marina.friedel@uni-leipzig.de](mailto:marina.friedel@uni-leipzig.de);  
[gabriel.chiodo@csic.es](mailto:gabriel.chiodo@csic.es); [konstantin.weber@env.ethz.ch](mailto:konstantin.weber@env.ethz.ch);

†These authors contributed equally to this work.

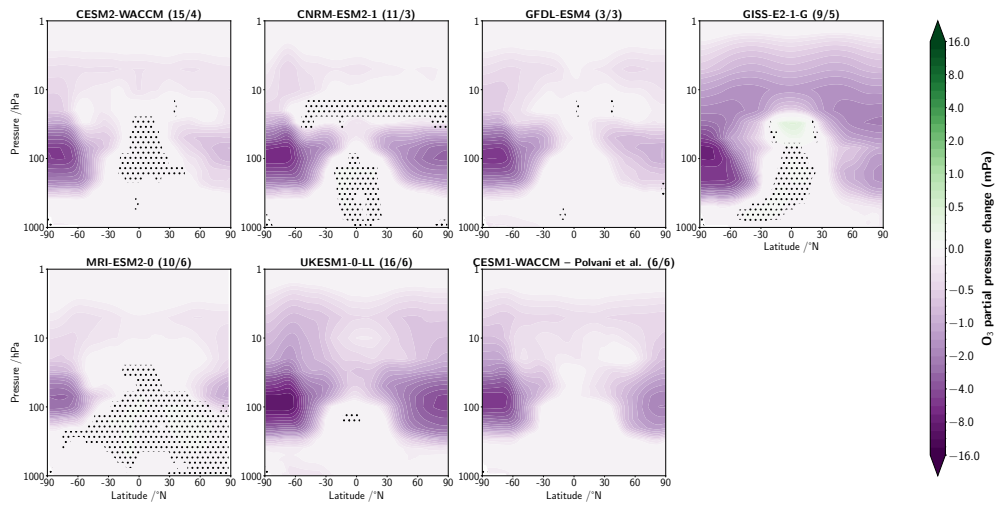

**Supplementary Figure 1** HC-induced changes in ozone from 1955–1964 to 1996–2005 derived by contrasting *historical* and *hist-1950HC* simulations. Stippling indicates non-significant changes (5% significance). Note the non-linear colorbar.

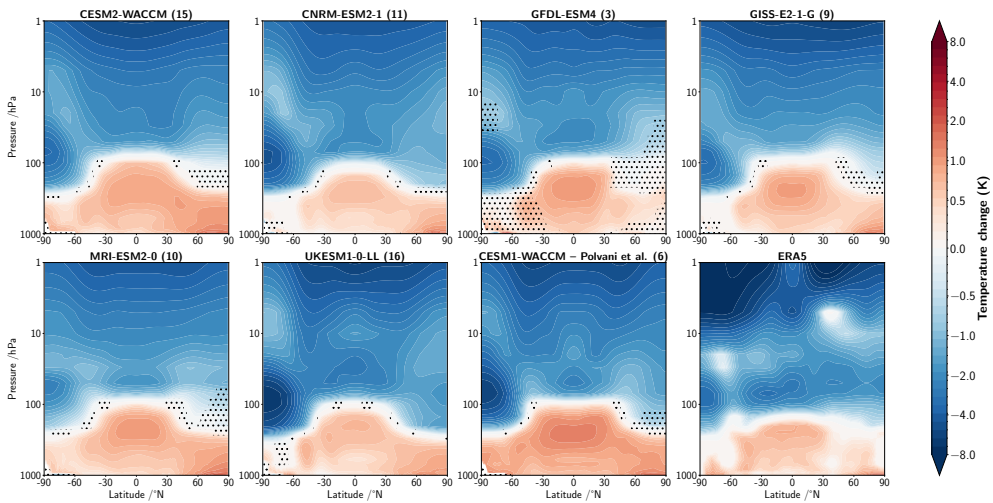

**Supplementary Figure 2** Zonal mean historical temperature change from 1955–1964 to 1996–2005 in *historical* simulations. Stippling indicates non-significant changes (5% significance). Note the non-linear colorbar.

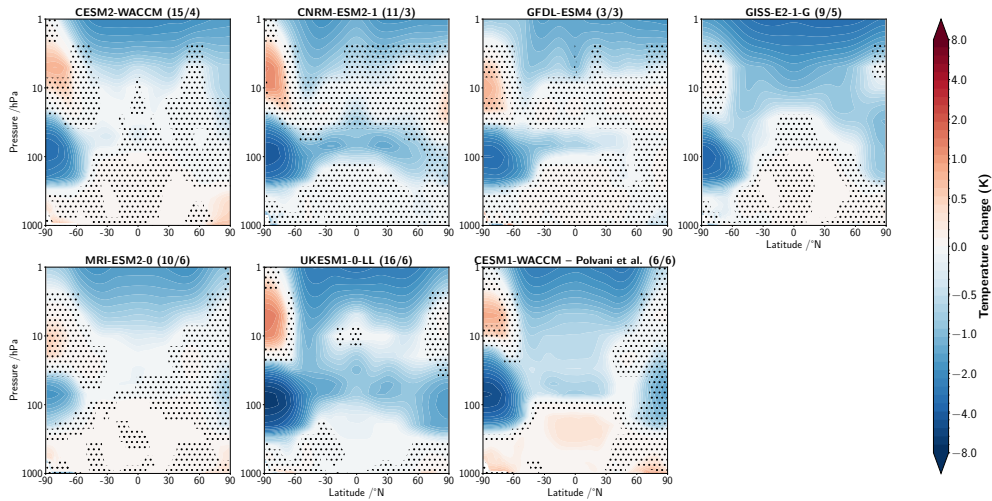

**Supplementary Figure 3** Zonal mean HC-induced temperature change from 1955–1964 to 1996–2005 derived by contrasting *historical* and *hist-1950HC* simulations. Stippling indicates non-significant changes (5% significance). Note the non-linear colorbar.

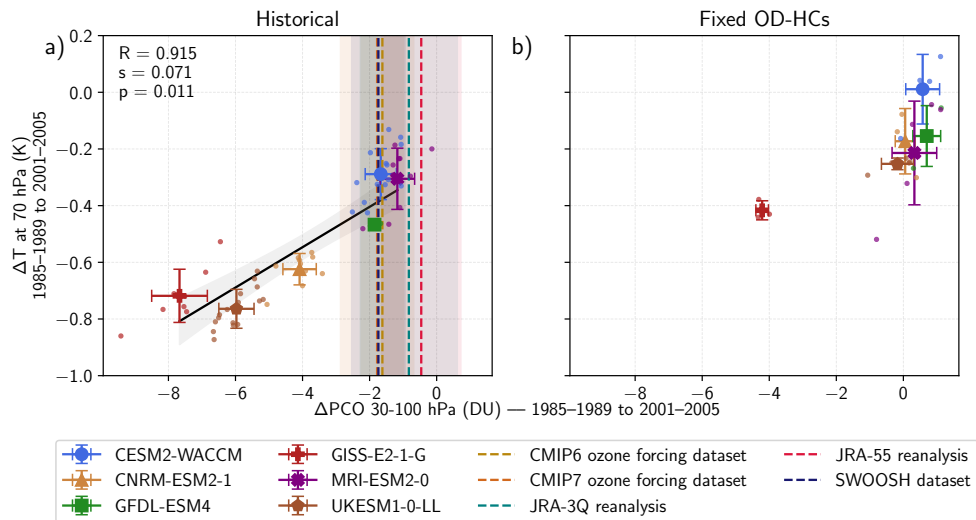

**Supplementary Figure 4** Analogous to Figure 2 in the main text, but for the shorter satellite period (1985 – 2005). All (re-analysis) datasets show an ozone depletion that is consistent with the lower range spanned by the AerChemMIP models. Strong ozone depletion is visible in GISS-E2-1-G even in the absence of ozone-depleting substances (panel b), justifying the exclusion of this model for analysis of the satellite period.

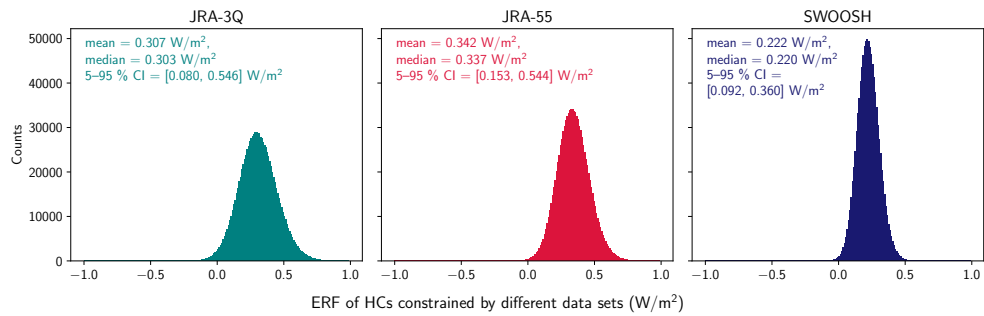

**Supplementary Figure 5** Derived distributions of the ERF of ozone-depleting halocarbons distributions using JRA-3Q, JRA-55 and SWOOSH together with model output from the satellite period (1985–1989 to 2001–2005).

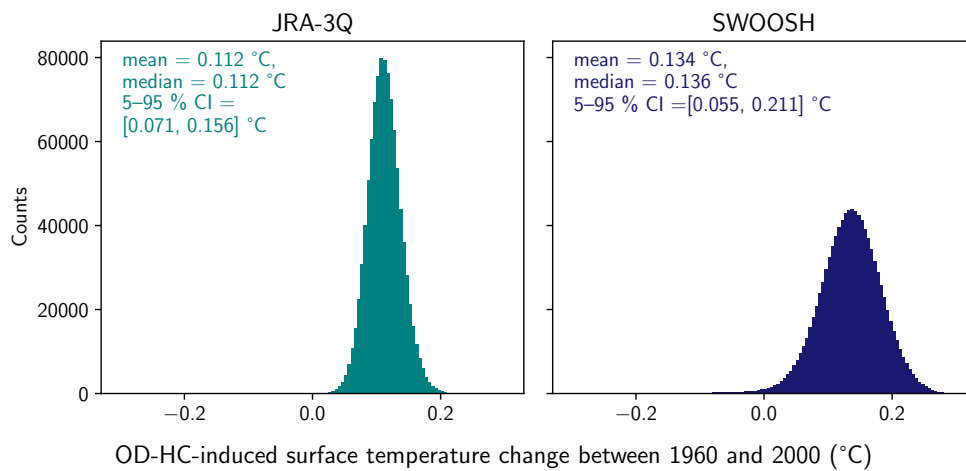

**Supplementary Figure 6** Distributions of the HC-induced surface temperature change calculated from weighted multi-model means using JRA-3Q (1955–1964 to 1996–2005) or SWOOSH (1985–1989 to 2001–2005) PCO changes.
